# Supplementary material for: Serum total testosterone and the prognosis of patients with advanced liver disease: a systemic review and meta-analysis
Source: PeerJ. 2026 Jan 13;14:e20571. doi: 10.7717/peerj.20571 (PMC12810399; doi:10.7717/peerj.20571)
Supplement: Supplemental Information 1 [file peerj-14-20571-s001.xlsx]

## Sheet: Sheet1
Study	Location	Study design	Diagnosis	Sample size	Mean age (years)	Men (%)	Mean MELD scores	Timing for measuring TT	Cutoff of testosterone	Median follow-up duration (months)	No. of paitents died or receiving LT	Variables adjusted
Grossmann 2012	Australia	RC	Men with ALD on LT list	171	53	100	16	At enrollment	TT < 5nM	8	119	Age, sodium and MELD score
Sinclair 2016a	Australia	RC	Men with decompensated liver cirrhosis for LT evaluation	145	54	100	17	At enrollment	TT < 8nM	8.3	135	Age, MELD score, and muscle mass
Sinclair 2016b	Australia	PC	Men with cirrhosis	268	55	100	10	At enrollment	TT < 8.3nM	12	50	Age and MELD score
Mallepally 2019	USA	RC	Men with cirrhosis	257	61	100	NR	At enrollment	Median (NR)	NR	156	Age, and MELD-Na score
Paternostro 2019	Austria	PC	Men with cirrhosis	114	55	100	13.6	At enrollment	TT < 21.6nM	13	70	Age, CPS, HCC, MELD score, SCr, albumin, and presence of ascites
Huang 2021	China	PC	Men with HBV related ACLF	160	45	100	NR	At enrollment	TT < 4.8nM	3	55	Age, BMI, INR, BUN, TB, DB, WBC, PLT, TC and TP
Sun 2021	China	PC	Patients with HBV related ACLF	108	46.2	87	21.3	At enrollment	TT < 4ng/mL	1	24	Age, sex, comorbidities, treatments, WBC, TB, ALT, AST, albumin, INR, sodium and SCr
Apostolov 2023	Australia	RC	Men with cirrhosis	766	56	100	14	At enrollment	TT < 12nM	12	381	Age, MELD, and CPS

## Sheet: Sheet2
Study	Representativeness of the exposed cohort	Selection of the non exposed cohort	Ascertainment of exposure	Outcome not present at baseline	Control for age and sex	Control for other confounding factors	Assessment of outcome	Enough long follow-up duration	Adequacy of follow-up of cohorts	Total	12 months
Grossmann 2012	0	1	1	1	1	1	1	0	1	7
Sinclair 2016a	0	1	1	1	1	1	1	0	1	7
Sinclair 2016b	1	1	1	1	1	1	1	1	1	9
Mallepally 2019	1	1	0	1	1	1	1	0	1	7
Paternostro 2019	1	1	1	1	1	1	0	1	1	8
Huang 2021	1	1	1	1	1	1	1	0	1	8
Sun 2021	1	1	1	1	1	1	1	0	1	8
Apostolov 2023	0	1	1	1	1	1	1	1	1	8

## Sheet: Sheet3
TT	HR	LL	UL	lnRR	SE
Grossmann 2012	1.89	1.18	3.02	0.636577	0.23973
Sinclair 2016a	2.36	1.39	4	0.858662	0.26964
Sinclair 2016b	2.36	1.16	4.81	0.858662	0.362826
Mallepally 2019	1.59	1.09	2.31	0.463734	0.191599
Paternostro 2019	3.07	1.52	6.17	1.12168	0.357395
Huang 2021	2.57	1.09	6.02	0.943906	0.435946
Sun 2021	1.65	0.9	3.03	0.500775	0.309674
Apostolov 2023	1.63	1.17	2.27	0.48858	0.169076
